# Supplementary material
Source: publisher site journal article supplement (https://www.dovepress.com/article/489723)
Supplement: Supplementary file 1 [file get_supplementary_file.php]

**Supplement table 1.** Baseline characteristics of participants by relapse

| **Characteristics** | **Primary Group (n=75)** | **Relapse Group (n=109)** | ***P* value** |
| --- | --- | --- | --- |
| **Demographic characters** |  |  |  |
| Female (%) | 47 (62.67) | 83 (76.15) | 0.048 |
| Age (years) | 43.72 ± 16.56 | 48.00 ± 15.33 | 0.073 |
| SBP (mmHg) | 111.04 ± 14.85 | 113.64 ± 16.86 | 0.282 |
| BMI (kg/m2) | 21.21 ± 3.14 | 21.61 ± 3.20 | 0.402 |
| Disease course (days) | 60 (60) | 80 (112) | 0.002 |
| **Onset season** |  |  |  |
| Spring and winter (%) | 32 (42.67) | 61 (55.96) | 0.076 |
| **Inducing factors** |  |  |  |
| Respiratory infection (%) | 16 (21.33) | 19 (17.43) | 0.508 |
| Gastrointestinal infection (%) | 5 (6.67) | 1 (0.92) | 0.031 |
| **Clinical features** |  |  |  |
| Autoimmune diseases (%) | 29 (38.67) | 44 (40.37) | 0.817 |
| EDSS score | 4.77 ± 2.15 | 4.95 ± 2.23 | 0.585 |
| Vision impaired (%) | 29 (38.67) | 59 (54.13) | 0.039 |
| Muscle weakness (%) | 47 (62.67) | 77 (70.64) | 0.257 |
| Numbness symptoms (%) | 57 (76.00) | 77 (70.64) | 0.422 |
| Muscular sphincter dysfunction (%) | 29 (38.67) | 41 (37.61) | 0.885 |
| **Laboratory data** |  |  |  |
| LDL-C (mmo/L) | 2.40 ± 0.77 | 3.03 ± 0.83 | < 0.001 |
| LDL-C of female (mmo/L) | 2.54 ± 0.83 | 3.12 ± 0.84 | < 0.001 |
| LDL-C of male (mmo/L) | 2.16 ± 0.62 | 2.75 ± 0.75 | 0.003 |
| HDL-C (mmo/L) | 1.30 ± 0.44 | 1.44 ± 0.39 | 0.027 |
| TG (mmo/L) | 1.30 ± 0.63 | 1.27 ± 0.57 | 0.740 |
| ALT (U/L) | 19.00 (13.50) | 23.00 (17.00) | 0.029 |
| Glu (mmol/L) | 5.61 ± 1.80 | 5.68 ± 1.64 | 0.773 |
| BUN (mmol/L) | 5.42 ± 1.44 | 5.10 ± 1.76 | 0.193 |
| UA (mmol/L) | 0.26 ± 0.09 | 0.30 ± 0.11 | 0.047 |
| SCR (μmol/L) | 59.69 ± 16.85 | 54.95 ± 14.77 | 0.045 |
| Blood WBC (×109/L) | 7.57 ± 3.31 | 8.46 ± 3.63 | 0.397 |
| AQP4-IgG positive (%) | 29 (38.67) | 63 (57.80) | 0.011 |
| MOG-IgG positive (%) | 5 (6.67) | 6 (5.50) | 0.744 |
| **CSF data** |  |  |  |
| Protein (g/L) | 0.35 (0.23) | 0.41 (0.22) | 0.118 |
| QALB (×10-3) | 5.65 (3.31) | 6.72 (3.04) | 0.262 |
| IgG (mg/dL) | 42.60 (43.40) | 38.30 (28.45) | 0.814 |
| IgG index | 0.53 ± 0.16 | 0.54 ± 0.18 | 0.669 |
| OB positive (%) | 7 (9.33) | 8 (7.34) | 0.627 |
| **Imaging lesion** |  |  |  |
| Optic nerve (%) | 16 (21.33) | 36 (33.03) | 0.083 |
| Spinal (%) | 48 (64.00) | 60 (55.05) | 0.225 |
| Brainstem (%) | 6 (8.00) | 11 (10.09) | 0.630 |
| **Treatment** |  |  |  |
| Glucocorticoid (%) | 66 (88.00) | 88 (80.73) | 0.190 |
| IVIG (%) | 10 (13.33) | 8 (7.34) | 0.179 |
| Cyclophosphamide (%) | 4 (5.33) | 9 (8.26) | 0.447 |
| Azathioprine (%) | 6 (8.00) | 14 (12.84) | 0.300 |
| Plasma exchange (%) | 9 (12.00) | 20 (18.35) | 0.245 |
| Antihypertensive drugs (%) | 9 (12.00) | 11 (10.09) | 0.683 |
| Antidiabetic drugs (%) | 11 (14.67) | 15 (13.76) | 0.862 |
| Lipid lowering drugs (%) | 9 (12.00) | 12 (11.01) | 0.835 |

ALT: Alanine transaminase, AQP4: aquaporin-4, BMI: body mass index, BUN: blood urine nitrogen, CSF: cerebrospinal fluid protein, EDSS: Expanded Disability Status Scale, HDL-C: High density lipoprotein cholesterol, IgG: immunoglobulin G, IVIG: Intravenous immunoglobulin, LDL-C: Low-density lipoprotein cholesterol, OB: Oligoclonal Bands, QALB: cerebrospinal fluid albumin / serum albumin ratio, SBP: systolic blood pressure, SCR: serum creatinine, TG: Triglyceride, UA: uric acid, WBC: white blood cell.

**Supplement Table 2.**  Prevalence of relapse by LDL-C tertiles and gender

| **LDL-C** | **Tertile 1** | **Tertile 2** | **Tertile 3** | ***P* value** |
| --- | --- | --- | --- | --- |
| **Female** |  |  |  |  |
| Number of patients | 43 | 43 | 44 |  |
| LDL-C, mean (min-max) (mmol/L) | 1.95 (1.06 - 2.43) | 2.87 (2.46 - 3.32) | 3.88 (3.37 - 5.36) | <0.001 |
| Prevalence of relapse (%) | 19/130 (14.61) | 28/130 (21.54) | 36/130 (27.69) | 0.001 |
| **Male** |  |  |  |  |
| Number of patients | 18 | 18 | 18 |  |
| LDL-C, mean (min-max) (mmol/L) | 1.74 (1.05 - 2.12) | 2.30 (2.16 - 2.55) | 3.29 (2.63 - 4.22) | <0.001 |
| Prevalence of relapse (%) | 6/54 (11.11) | 8/54 (14.81) | 12/54 (22.22) | 0.012 |
| **Total** |  |  |  |  |
| Number of patients | 61 | 61 | 62 |  |
| LDL-C, mean (min-max) (mmol/L) | 1.85 (1.05-2.31) | 2.68 (2.32-3.21) | 3.76 (3.23-5.36) | <0.001 |
| Prevalence of relapse (%) | 25/184 (13.58) | 37/184 (20.10) | 47/184 (25.54) | <0.001 |

**Supplement Table 3.**  Prevalence of relapse by clinic value of LDL-C and gender

| **LDL-C** | **Normal group**  **< 3.12 mmol/L** | **High group**  **≥ 3.12 mmol/L** | ***P* value** |
| --- | --- | --- | --- |
| **Female** |  |  |  |
| Number of patients | 72 | 58 |  |
| LDL-C, mean (min-max) (mmol/L) | 2.25 (1.06-3.08) | 3.73 (3.15-5.36) | <0.001 |
| Prevalence of relapse (%) | 37/130 (28.46) | 46/130 (35.38) | <0.001 |
| **Male** |  |  |  |
| Number of patients | 41 | 13 |  |
| LDL-C, mean (min-max) (mmol/L) | 2.11 (1.05 - 2.88) | 3.51 (3.18 - 4.22) | <0.001 |
| Prevalence of relapse (%) | 16/54 (29.63) | 10/54 (18.51) | 0.017 |
| **Total** |  |  |  |
| Number of patients | 113 | 71 |  |
| LDL-C, mean (min-max) (mmol/L) | 2.20 (1.05 - 3.08) | 3.69 (3.15 – 5.36) | <0.001 |
| Prevalence of relapse (%) | 53/184 (28.80) | 56/184 (30.43) | <0.001 |

**Supplement Table 4. Univariate analysis of relapse**

| **Variable** | **Statistics** | **OR (95%CI** | ***p* value** |
| --- | --- | --- | --- |
| Sex (%) |  |  |  |
| Men | 54 (29.35) | 1.0 |  |
| Women | 130 (70.65) | 1.90 (1.00, 3.62) | 0.048 |
| Age (years) | 46.26 ± 15.94 | 1.02 (1.00, 1.04) | 0.074 |
| Spring and winter (%) |  |  |  |
| No | 91 (49.46) | 1.0 |  |
| Yes | 93 (50.54) | 1.71 (0.94, 3.09) | 0.077 |
| Gastrointestinal infection (%) |  |  |  |
| No | 178 (96.74) | 1.0 |  |
| Yes | 6 (3.26) | 0.13 (0.01, 1.13) | 0.064 |
| Vision impaired (%) |  |  |  |
| No | 96 (52.17) | 1.0 |  |
| Yes | 88 (47.83) | 1.87 (1.03, 3.40) | 0.040 |
| LDL-C (mmo/L) | 2.77 ± 0.86 | 2.67 (1.76, 4.04) | <0.001 |
| HDL-C (mmo/L) | 1.38 ± 0.42 | 2.33 (1.09, 5.00) | 0.029 |
| ALT (U/L) | 26.02 ± 16.15 | 1.02 (1.00, 1.04) | 0.047 |
| UA (mmol/L) | 0.28 ± 0.11 | 1.95 (1.00, 3.82) | 0.050 |
| SCR (μmol/L) | 56.89 ± 15.78 | 0.98 (0.96, 1.00) | 0.047 |
| AQP4-IgG (%) |  |  |  |
| Negative | 92 (50.00) | 1.0 |  |
| Positive | 92 (50.00) | 2.17 (1.19, 3.96) | 0.011 |
| IVIG (%) |  |  |  |
| No | 166 (90.22) | 1.0 |  |
| Yes | 18 (9.78) | 0.51 (0.19, 1.37) | 0.184 |

**Supplement Table 5.** Sensitivity analysis on relationship of LDL-C and relapse

| **Variable** | **Model 1 (unadjusted)** | | **Model 2 (adjusted)** | |
| --- | --- | --- | --- | --- |
| **N** | **OR (95% CI) *p*** | **N** | **OR (95% CI) *p*** |
| All patients | 184 | 2.67 (1.76, 4.04) <0.001 | 184 | 2.38 (1.48, 3.83) <0.001 |
| Disease course≤365 days | 179 | 2.74 (1.79, 4.19) <0.001 | 179 | 2.55 (1.56, 4.17) <0.001 |
| Non- respiratory infection | 149 | 4.46 (2.54, 7.84) <0.001 | 149 | 4.15 (2.19, 7.88) <0.001 |
| Non- gastrointestinal infection | 178 | 2.58 (1.69, 3.94) <0.001 | 178 | 2.32 (1.44, 3.76) <0.001 |
| Non- lipid lowering drugs | 163 | 2.68 (1.71, 4.19) <0.001 | 163 | 2.40 (1.43, 4.04) <0.001 |
| Non-IVIG therapy | 166 | 2.65 (1.71, 4.11) <0.001 | 166 | 2.40 (1.45, 3.98) <0.001 |

Model 1: unadjusted

Model 2: adjusted for all the factors (sex, age, onset season, gastrointestinal infection, vision impaired, HDL-C, ALT, UA, SCR, AQP4-IgG, and IVIG) except the sensitivity factor itself.

**Supplement Table 6.** Hierarchical analysis on relationship of LDL-C and relapse

| **Hierarchical factor** | | **Model 1 (unadjusted)** | | | | | | **Model 2 (adjusted)** | |
| --- | --- | --- | --- | --- | --- | --- | --- | --- | --- |
| **N** | **Events, n (%)** | **OR (95%CI)  *P*** | ***P* for interaction** | **N** | **OR (95%CI)  *P*** | | ***P* for interaction** |
| Gender | Male | 54 | 26 (48.15) | 3.83 (1.27, 11.56) 0.017 | 0.384 | 54 | 3.67 (1.42, 9.46) 0.007 | | 0.320 |
| Female | 130 | 83 (63.85) | 2.32 (1.45, 3.73) <0.001 | 130 | 2.10 (1.25, 3.53) 0.005 | |
| Age | Age<45 | 84 | 48 (57.14) | 4.03 (1.99, 8.19) <0.001 | 0.114 | 84 | 3.67 (1.70, 7.89) 0.001 | | 0.132 |
| Age≥45 | 100 | 61 (61.00) | 2.02 (1.21, 3.39) 0.007 | 100 | 1.81 (1.01, 3.22) 0.044 | |
| Spring and winter | No | 91 | 48 (52.75) | 2.18 (1.27, 3.73) 0.004 | 0.243 | 91 | 1.78 (0.97, 3.24) 0.061 | | 0.155 |
| Yes | 93 | 61 (65.59) | 3.62 (1.84, 7.11) <0.001 | 93 | 3.43 (1.65, 7.15) 0.001 | |
| Autoimmune diseases | No | 111 | 65 (58.56) | 2.16 (1.34, 3.49) 0.001 | 0.129 | 111 | 2.03 (1.16, 3.55) 0.013 | | 0.323 |
| Yes | 73 | 44 (60.27) | 4.41 (1.92, 10.12) 0.001 | 73 | 3.37 (1.40, 8.15) 0.006 | |
| EDSS | Score<5 | 95 | 50 (52.63) | 2.34 (1.28, 4.28) 0.005 | 0.458 | 95 | 2.25 (1.16, 4.37) 0.017 | | 0.739 |
| Score≥5 | 89 | 59 (66.29) | 3.23 (1.78, 5.87) <0.001 | 89 | 2.63 (1.36, 5.09) 0.004 | |
| Vision impaired | No | 96 | 50 (52.08) | 2.73 (1.53, 4.85) <0.001 | 0.763 | 96 | 2.49 (1.28, 4.85) 0.007 | | 0.847 |
| Yes | 88 | 59 (67.05) | 2.40 (1.30, 4.42) 0.005 | 88 | 2.28 (1.20, 4.33) 0.011 | |
| HDL-C | HDL-C<1.36 | 90 | 44 (48.89) | 2.53 (1.32, 4.84) 0.005 | 0.946 | 90 | 2.07 (1.03, 4.18) 0.042 | | 0.702 |
| HDL-C≥1.36 | 94 | 65 (69.15) | 2.46 (1.40, 4.31) 0.001 | 94 | 2.38 (1.30, 4.35) 0.005 | |
| ALT | ALT<22 | 92 | 47 (51.09) | 2.39 (1.42, 4.02) 0.001 | 0.483 | 92 | 1.96 (1.09, 3.51) 0.024 | | 0.257 |
| ALT≥22 | 92 | 62 (67.39) | 3.33 (1.55, 7.18) 0.002 | 92 | 3.25 (1.62, 6.53) <0.001 | |
| UA | UA<0.27 | 91 | 48 (52.75) | 4.13 (2.21, 7.73) <0.001 | 0.053 | 91 | 3.51 (1.75, 7.02) <0.001 | | 0.071 |
| UA≥0.27 | 93 | 61 (65.59) | 1.64 (0.90, 2.99) 0.108 | 93 | 1.49 (0.78, 2.85) 0.224 | |
| AQP4-IgG | Negative | 92 | 46 (50.00) | 3.42 (1.84, 6.37) <0.001 | 0.176 | 92 | 2.91 (1.49, 5.65) 0.001 | | 0.374 |
| Positive | 92 | 63 (68.48) | 1.93 (1.01, 3.69) 0.046 | 92 | 1.91 (1.07, 3.42) 0.029 | |
| IVIG | No | 166 | 101 (60.84) | 2.65 (1.71, 4.11) <0.001 | 0.913 | 166 | 2.40 (1.45, 3.98) <0.001 | | 0.931 |
| Yes | 18 | 8 (44.44) | 2.44 (0.61, 9.80) 0.207 | 18 | 2.24 (0.53, 9.55) 0.274 | |

Model 1: unadjusted

Model 2: each stratification adjusted for all the factors (sex, age, onset season, gastrointestinal infection, vision impaired, HDL-C, ALT, UA, SCR, AQP4-IgG, and IVIG) except the stratification factor itself.

**Supplement Table 7.**  Prevalence of relapse by LDL-C lowing target value and gender

| **LDL-C** | **Low group**  **< target value** | **High group**  **≥ target value** | ***P* value** |
| --- | --- | --- | --- |
| **Female** |  |  |  |
| Number of patients | 65 | 65 |  |
| LDL-C level (mmol/L) | < 2.790 | ≥ 2.790 |  |
| Prevalence of relapse (%) | 31/65 (47.69) | 52/65 (80.00) | <0.001 |
| **Male** |  |  |  |
| Number of patients | 38 | 16 |  |
| LDL-C level (mmol/L) | < 2.695 | ≥ 2.695 |  |
| Prevalence of relapse (%) | 14/38 (36.84) | 12/16 (75.00) | 0.010 |
| **Total** |  |  |  |
| Number of patients | 105 | 79 |  |
| LDL-C level (mmol/L) | < 2.795 | ≥ 2.795 |  |
| Prevalence of relapse (%) | 46/105 (43.81) | 63/79 (79.75) | <0.001 |
